# Supplementary material for: Teriparatide or Alendronate in Glucocorticoid-Induced Osteoporosis
Source: Atypon-hosted journal article supplement (doi:10.1056/nejmoa071408), 2007-11-14
Supplement: nejm_saag_2028sa1.pdf [file nejm_saag_2028sa1.pdf]

## Supplementary Appendix

This appendix has been provided by the authors to give readers additional information about their work.

Supplement to: Saag KG, Shane E, Boonen S, et al. Teriparatide or alendronate in glucocorticoid-induced osteoporosis. *N Engl J Med* 2007;357:2028-39.

Appendix Table 1. Change from baseline in bone mineral density (g/cm<sup>2</sup>).

|              | <b>Alendronate</b> |               | <b>Teriparatide</b> |               | Alendronate vs.<br>Teriparatide<br>P-value |
|--------------|--------------------|---------------|---------------------|---------------|--------------------------------------------|
|              | No. Patients       | Mean ± SE     | No. Patients        | Mean ± SE     |                                            |
| Lumbar Spine |                    |               |                     |               |                                            |
| Month 3      | 184                | 0.014 ± 0.004 | 183                 | 0.020 ± 0.004 | 0.07                                       |
| Month 6      | 173                | 0.018 ± 0.004 | 178                 | 0.035 ± 0.004 | <0.001                                     |
| Month 12     | 159                | 0.029 ± 0.004 | 170                 | 0.055 ± 0.004 | <0.001                                     |
| Month 18     | 148                | 0.033 ± 0.005 | 156                 | 0.067 ± 0.005 | <0.001                                     |
| Total Hip    |                    |               |                     |               |                                            |
| Month 12     | 157                | 0.014 ± 0.004 | 167                 | 0.022 ± 0.004 | 0.011                                      |
| Month 18     | 144                | 0.018 ± 0.004 | 156                 | 0.027 ± 0.004 | 0.008                                      |
